# Supplementary material
Source: ML conference proceedings conference paper supplement (https://openaccess.thecvf.com/content/CVPR_2019/html/Li_Point-To-Pose_Voting_Based_CVPR_2019_paper.html)
Supplement: Supplementary file 1 [file Li_Point-To-Pose_Voting_Based_CVPR_2019_supplemental.pdf]

# Point-to-Pose Voting based Hand Pose Estimation using Residual Permutation Equivariant Layer

## Supplementary Material

Shile Li

Technical University of Munich

li.shile@mytum.de

Dongheui Lee

Technical University of Munich, German Aerospace Center

dhlee@tum.de

### 1. Comparison of different network structures

Besides the experiment listed in the main paper, we also performed self-comparison at the initial exploration stage to verify the advantage of ResPEL network. From Table 1, the incremental improvements of residual version and voting scheme can be shown. 4PELs is a shallow network with four PELs with (64,256,512,1024) hidden neurons and Maxpooling means the voting scheme is replaced by a max-pooling layer and 4 consequent fully-connected layers to regress the hand pose. By replacing the shallow network with residual version (ResPEL+Maxpooling), the pose error is reduced significantly. Further improvement can be achieved by using our proposed voting scheme (ResPEL+Voting).

|                       | 4PELs+<br>Maxpooling | ResPEL+<br>Maxpooling | ResPEL+<br>Voting |
|-----------------------|----------------------|-----------------------|-------------------|
| mean joint error [mm] | 16.60                | 11.02                 | 8.35              |

Table 1. Self-comparison of different network structures on NYU dataset (three views)
